# Supplementary material for: Oral Colonization ofStaphylococcusSpecies in a Peritoneal Dialysis Population: A Possible Reservoir for PD-Related Infections?
Source: Hindawi journal article supplement (doi:10.1155/2018/5789094), 2018-08-02
Supplement: f1 [file 5789094.f1.pdf]

**Supplementary Table 1:** *Staphylococcus* species identified in peritoneal dialysis (PD) patients and controls. n reports to the number of individuals, PD patients and controls, where each of the *Staphylococcus* specie was identified.

|          |             | <i>Staphylococcus</i> species (n)               | Accession number                                        |            |
|----------|-------------|-------------------------------------------------|---------------------------------------------------------|------------|
| Controls | PD patients | <i>S. saprophyticus</i> subsp. <i>bovis</i> (1) | AB234088.1                                              |            |
|          |             | <i>S. capitis</i> subsp. <i>urealyticus</i> (3) | AB234061.1                                              |            |
|          |             | <i>S. cohnii</i> subsp. <i>cohnii</i> (1)       | AB234066.1                                              |            |
|          |             |                                                 | <i>S. epidermidis</i> (30)                              | AB234069.1 |
|          |             |                                                 | <i>S. aureus</i> subsp. <i>aureus</i> (8)               | AB234058.1 |
|          |             |                                                 | <i>S. pasteurii</i> (2)                                 | CP004014.1 |
|          |             |                                                 | <i>S. saprophyticus</i> subsp. <i>saprophyticus</i> (4) | AB234089.1 |
|          |             |                                                 | <i>S. hominis</i> subsp. <i>novobiosepticus</i> (2)     | AB234076.1 |
|          |             |                                                 | <i>S. capitis</i> subsp. <i>capitis</i> (1)             | AB234060.1 |
|          |             |                                                 | <i>S. hominis</i> subsp. <i>hominis</i> (2)             | AB234075.1 |
|          |             |                                                 | <i>S. lugdunensis</i> (1)                               | AB234081.1 |
|          |             |                                                 | <i>S. warneri</i> (2)                                   | AB234328.1 |
